# Supplementary material
Source: PubMed Central journal article supplement (PMC8382582)
Supplement: mmc1.pdf [file mmc1.pdf]

**Supplemental information**

**A SARS-CoV-2 antibody broadly neutralizes  
SARS-related coronaviruses and variants by  
coordinated recognition of a virus-vulnerable site**

**Taishi Onodera, Shunsuke Kita, Yu Adachi, Saya Moriyama, Akihiko Sato, Takao Nomura, Shuhei Sakakibara, Takeshi Inoue, Takashi Tadokoro, Yuki Anraku, Kohei Yumoto, Cong Tian, Hideo Fukuhara, Michihito Sasaki, Yasuko Orba, Nozomi Shiwa, Naoko Iwata, Noriyo Nagata, Tateki Suzuki, Jiei Sasaki, Tsuyoshi Sekizuka, Keisuke Tonouchi, Lin Sun, Shuetsu Fukushi, Hiroyuki Satofuka, Yasuhiro Kazuki, Mitsuo Oshimura, Tomohiro Kurosaki, Makoto Kuroda, Yoshiharu Matsuura, Tadaki Suzuki, Hirofumi Sawa, Takao Hashiguchi, Katsumi Maenaka, and Yoshimasa Takahashi**

**A**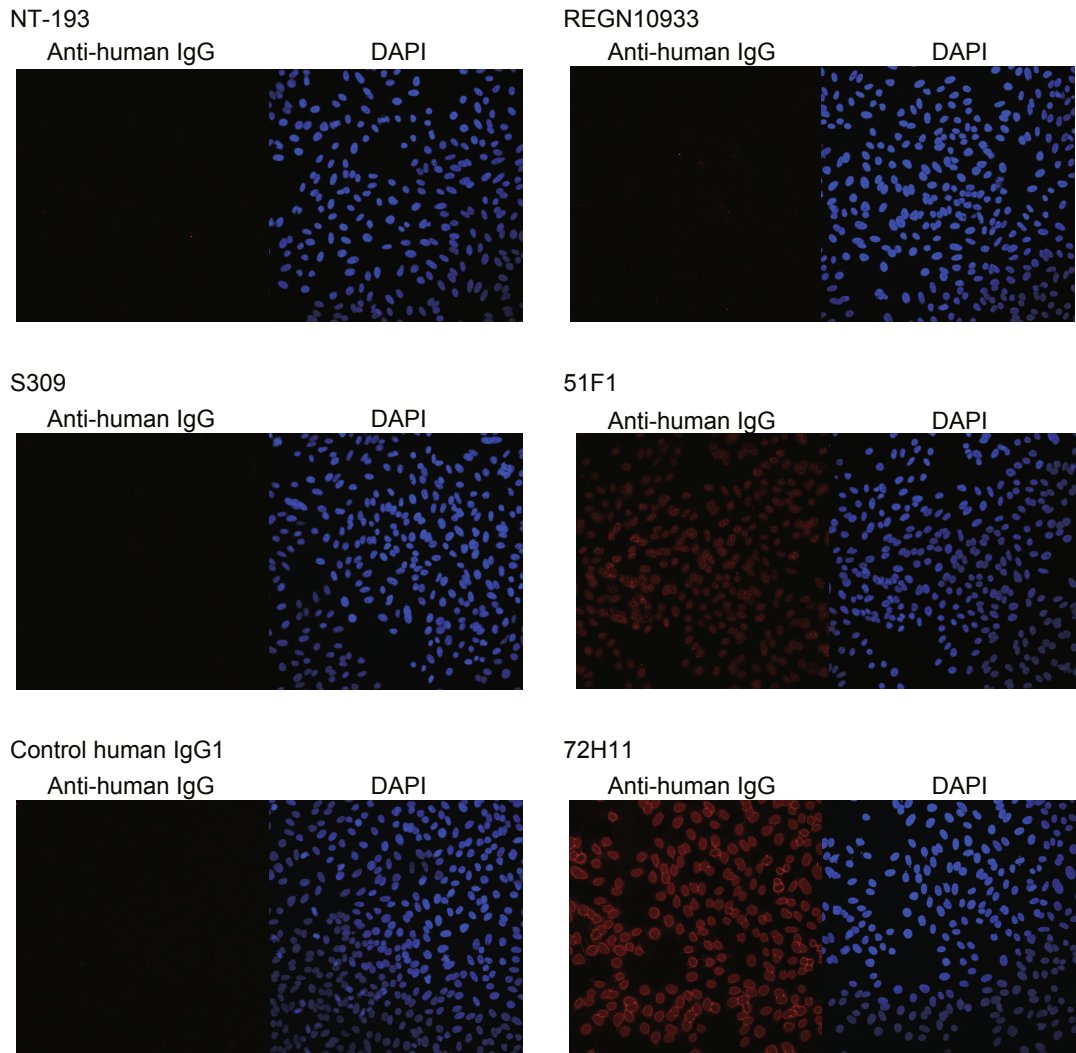**B**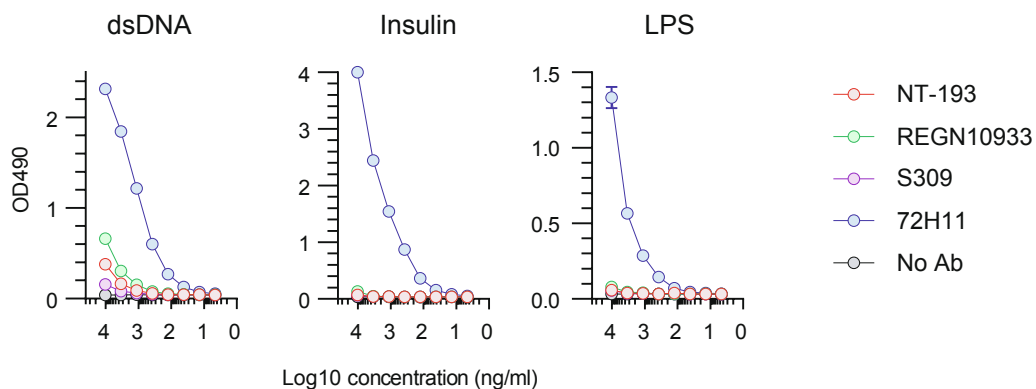**Figure S1. NT-193 is neither autoreactive or polyreactive, Related to Figure 1.**

(A) Autoreactivity of NT-193 was assessed under immunofluorescence assay using Hep-2 cells. The representative staining of human IgG1 antibodies is shown from NT-193, REGN10933, and S309 along with reference antibodies (51F1, 72H11, and polyclonal human IgG1). (B) Polyreactivity of NT-193 was assessed under ELISA using dsDNA, insulin, and LPS as coated antigens. Polyreactive human IgG1 (72H11) was loaded as positive control. Values represent mean  $\pm$  SD. The representative data from three independent experiments are shown.

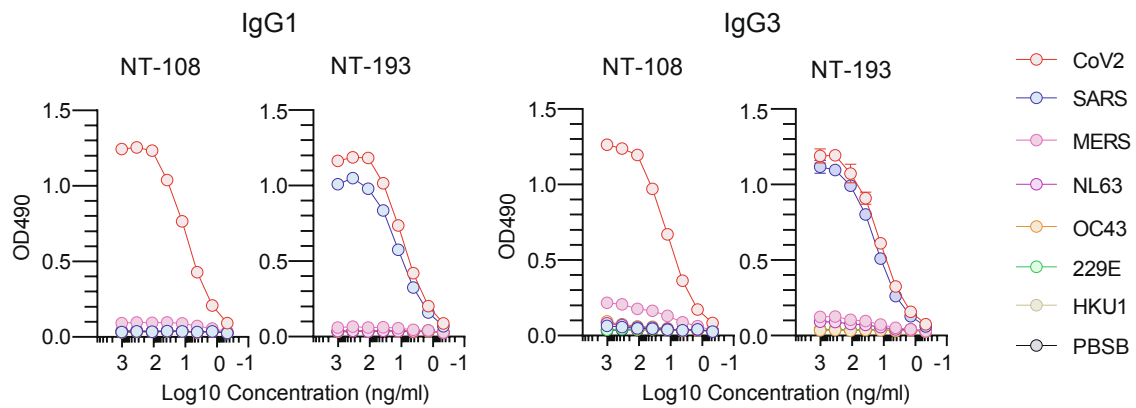

**Figure S2. NT-108 and NT-193 fail to cross-react coronavirus S-trimer antigens, Related to Figure 2.**

S-trimer antigens from the indicated coronaviruses were coated on ELISA plate and the binding of serially diluted NT-108 and NT-193 were assessed. IgG1 subclass is shown in left and IgG3 subclass in right panel. Values represent mean  $\pm$  SD. The representative data from three independent experiments are shown.

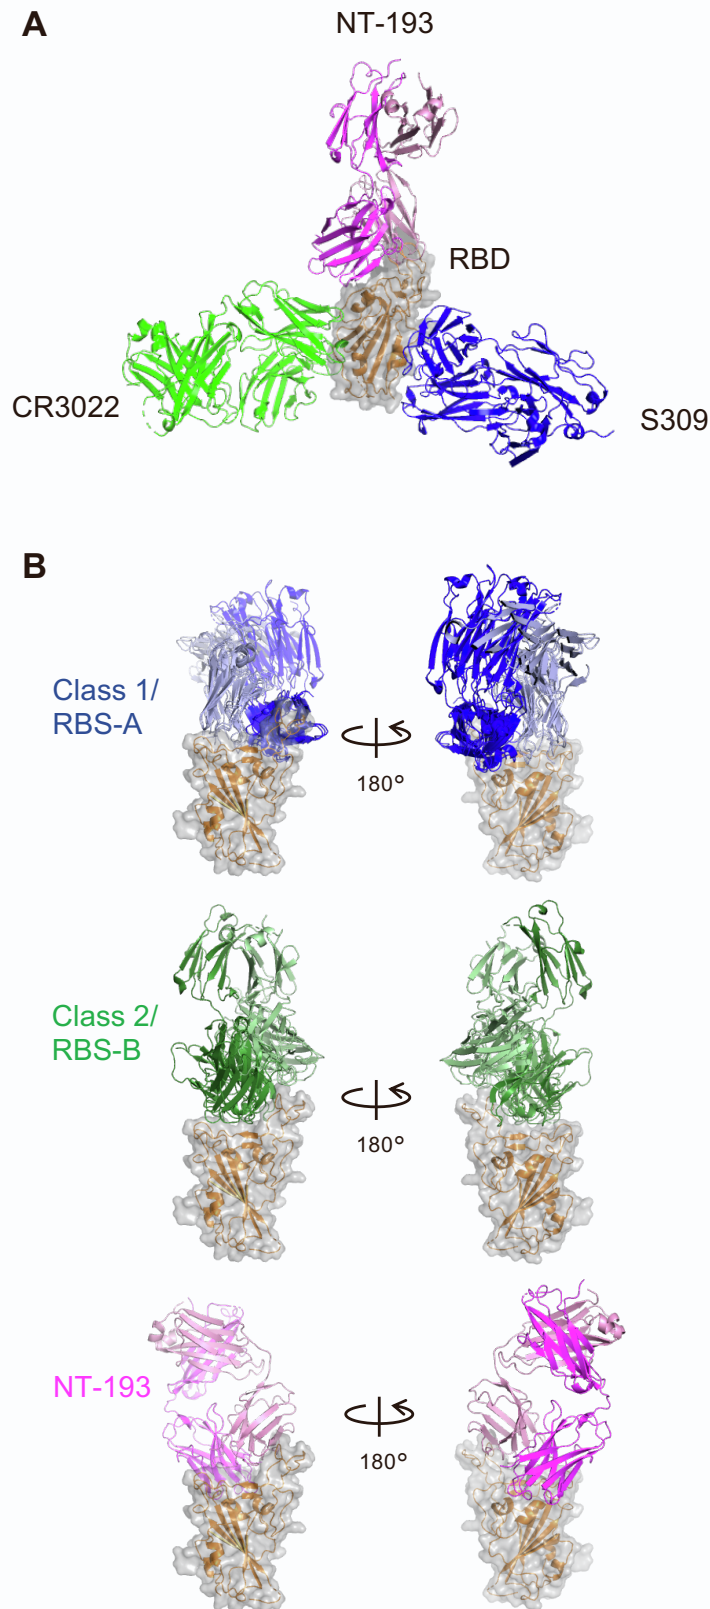

**Figure S3. The binding mode of NT-193 is distinct from previously isolated antibodies, Related to Figure 3.**

(A) The comparison of the NT-193 (magenta and pink) complex with CR3022 (green) and S309 (blue) complexes. The cartoon models are shown (magenta: NT-193 heavy chain, pink: NT-193 light chain, orange: RBD). (B) The comparison of the NT-193 complex (magenta and pink) with class 1/ RBS-A antibody complexes (dark and light blue) and class 2/RBS-B ones (dark and light green). The cartoon models are shown (magenta: NT-193 heavy chain, pink: NT-193 light chain, orange: RBD). The left models are shown at the same angle as the right one of NT-193 complex in Figure 3A. Left and right angles are almost 180 degree rotated.



A

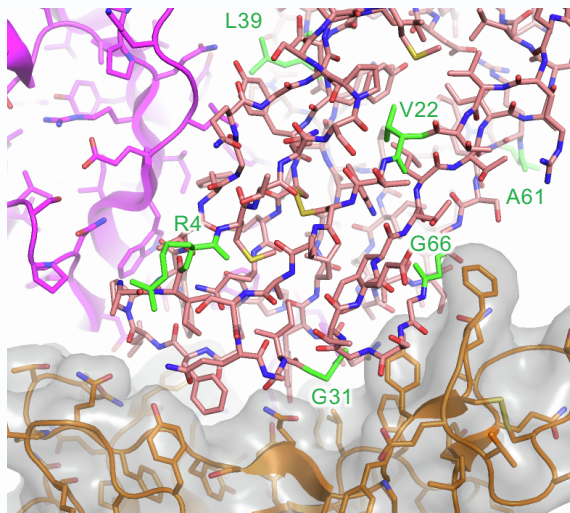

|          |   |    |    |    |    |    |
|----------|---|----|----|----|----|----|
| residues | 4 | 22 | 31 | 39 | 61 | 66 |
| NT-193   | R | V  | G  | L  | A  | G  |
| parental | Q | I  | S  | Q  | S  | S  |

B

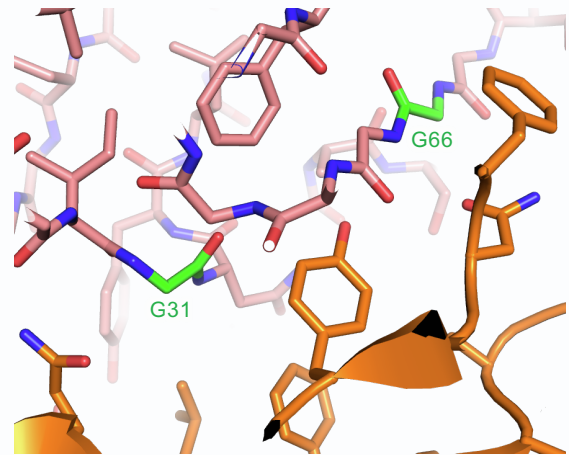

C

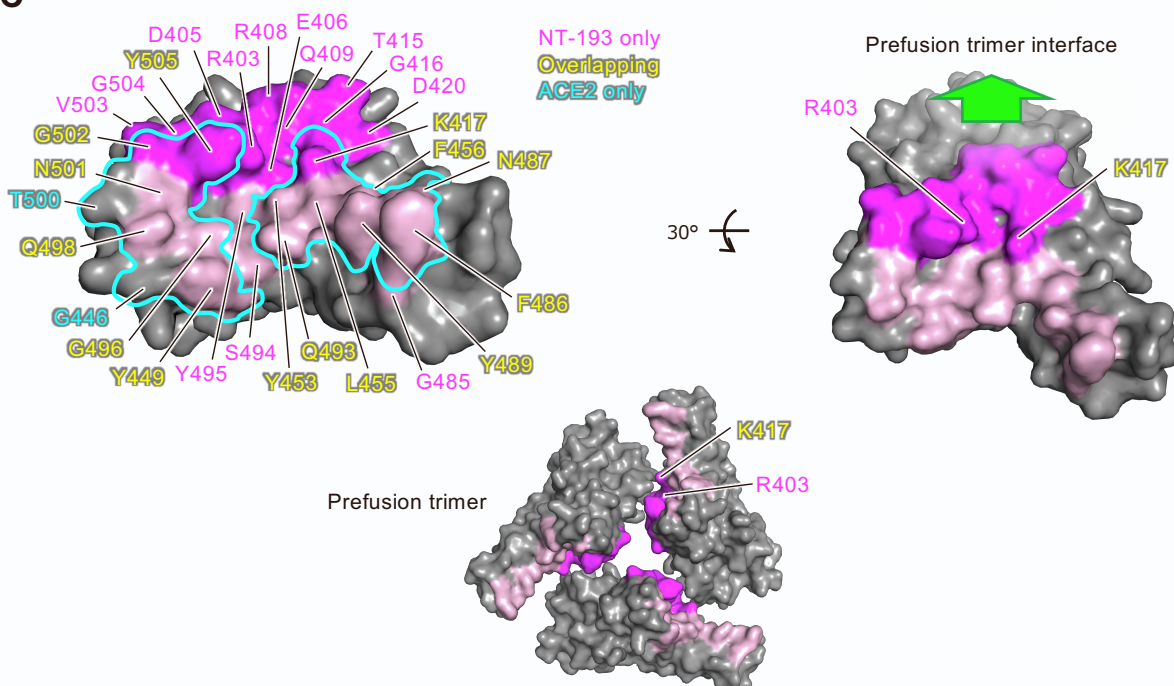

### Figure S4. NT-193 recognizes open RBD conformation via germline-encoded residues, Related to Figures 3 and 4.

(A, B) Mapping of somatically mutated sites onto the complex structure. (A) The NT-193 complex (magenta and pink stick models) with RBD (orange with transparent surface) is shown (top panel). The somatically mutated residues in NT-193 light chain are colored in green. The amino acid substitutions by these somatic hypermutations are summarized in the lower panel. (B) The closed-up view of the binding interfaces around G31 and G66 is shown. (C) Binding sites of NT-193 Fab-RBD complex. ACE2 and NT-193 binding residues on RBS. The binding areas for ACE2, NT-193 HC and LC are shown in cyan frame, magenta, and light pink, respectively. Top left, the surface models of RBS are shown. The angle is the same as Figure 3C. Top right, the model is rotated by about 30 degree compared with one of top left. Bottom, the model of RBD in closed prefusion trimer is shown.

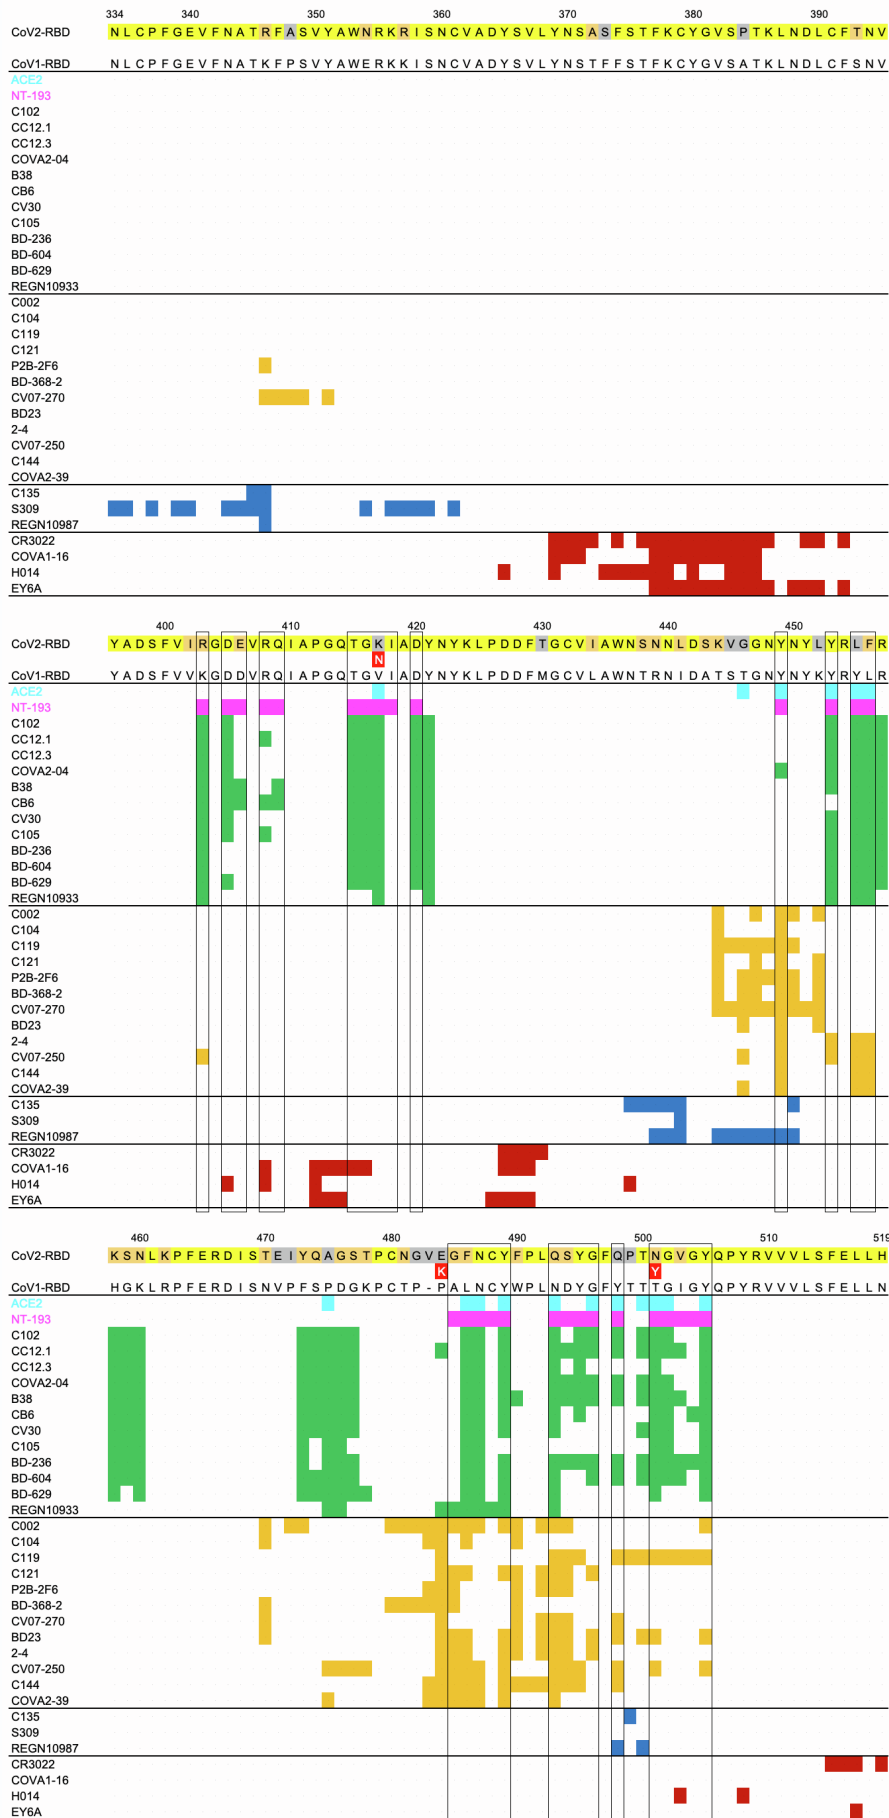

**Figure S5. Footprints of NT-193 differ from other antibodies, Related to Figures 3 and 4.** The CoV2 RBD residues are colored based on conservation with CoV1 similarly to Figure 3. The binding residues of RBD for ACE2 and each antibody are colored: ACE2 (cyan), NT-193 (magenta), class 1/RBS-A (green), class 2/RBS-B (orange), class 3 (blue), and class 4 (brown). The residues which contact ACE2, antibody, or RBD within a distance of 4 Å are defined as binding residues. The reported mutations (red) are shown in the column between CoV1 and CoV-2 sequences.

**A**

| Antibody                                           |       | NT-193   |          |          |          |          |          |          |
|----------------------------------------------------|-------|----------|----------|----------|----------|----------|----------|----------|
| Ab conc. for resistance check ( $\mu\text{g/mL}$ ) |       | 8        | 4        | 2        | 1        | 0.5      | 0.25     | No Ab    |
| Ab conc. for passaging ( $\mu\text{g/mL}$ )        | 50    | No CPE   |
|                                                    | 16.7  | Parental |
|                                                    | 5.5   | Parental |
|                                                    | 1.9   | No CPE   | No CPE   | Parental | Parental | Parental | Parental | Parental |
|                                                    | 0.6   | No CPE   | No CPE   | No CPE   | Parental | Parental | Parental | Parental |
|                                                    | No Ab | No CPE   | No CPE   | No CPE   | Parental | Parental | Parental | Parental |

  

| Antibody                                           |       | NT-108 + NT-193 |        |        |          |          |          |          |
|----------------------------------------------------|-------|-----------------|--------|--------|----------|----------|----------|----------|
| Ab conc. for resistance check ( $\mu\text{g/mL}$ ) |       | 8               | 4      | 2      | 1        | 0.5      | 0.25     | No Ab    |
| Ab conc. for passaging ( $\mu\text{g/mL}$ )        | 50    | No CPE          | No CPE | No CPE | No CPE   | No CPE   | No CPE   | No CPE   |
|                                                    | 16.7  | No CPE          | No CPE | No CPE | No CPE   | No CPE   | No CPE   | No CPE   |
|                                                    | 5.5   | No CPE          | No CPE | No CPE | Parental | Parental | Parental | Parental |
|                                                    | 1.9   | No CPE          | No CPE | No CPE | Parental | Parental | Parental | Parental |
|                                                    | 0.6   | No CPE          | No CPE | No CPE | Parental | Parental | Parental | Parental |
|                                                    | No Ab | No CPE          | No CPE | No CPE | Parental | Parental | Parental | Parental |

**B**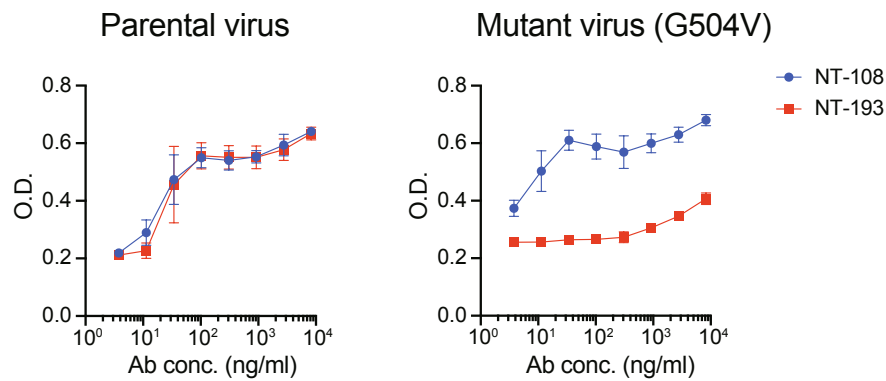

**Figure S6. Different screening approach selects the same escape mutation, Related to Figure 5.**

(A) CoV2 virus was passaged three times in the presence of NT-193 IgG3 or NT-108/NT-193 IgG3 antibodies at several concentrations (0.6, 1.9, 5.5, 16.7, and 50  $\mu\text{g/mL}$ ). After third passages, the viral RNAs were collected from CPE<sup>+</sup> wells (red or orange) and subjected to RBD sequencing (red; G504V mutation, orange; no mutation). In parallel, the viruses from CPE<sup>+</sup> wells were further cultured in the presence of NT-193 or NT-108/NT-193 (0.25, 0.5, 1, 2, 4, and 8  $\mu\text{g/mL}$ ) for resistance check. (B) Neutralizing activity of NT-108 and NT-193 IgG3 against G504V mutant and parental viruses was assessed. The CPEs were expressed as O.D. of MTT assay. Value represents mean  $\pm$  SD. The representative data from two independent experiments are shown.

**Table S1. Data collection statistics, Related to Figures 3 and 4.**

| <b>RBD_NT-193</b>                  |                                                |
|------------------------------------|------------------------------------------------|
| Wavelength                         | 0.98                                           |
| Resolution range                   | 49.3 - 2.80 (2.94 - 2.80)                      |
| Space group                        | P 2 <sub>1</sub> 2 <sub>1</sub> 2 <sub>1</sub> |
| Unit cell                          | 84.07 106.89 148.07 90 90 90                   |
| Total reflections                  | 227819 (30744)                                 |
| Unique reflections                 | 33594 (4373)                                   |
| Multiplicity                       | 6.8 (7.0)                                      |
| Completeness (%)                   | 100.0 (100.0)                                  |
| Mean I/sigma(I)                    | 10.3 (1.5)                                     |
| Wilson B-factor (Å <sup>2</sup> )  | 47                                             |
| R-merge                            | 0.153 (1.33)                                   |
| R-meas                             | 0.166 (1.43)                                   |
| R-pim                              | 0.063 (0.54)                                   |
| CC1/2                              | 0.99 (0.71)                                    |
| Resolution range in refinement     | 45.1 - 2.80 (2.90 - 2.80)                      |
| Reflections used in refinement     | 33522 (3301)                                   |
| Reflections used for R-free        | 1661 (169)                                     |
| R-work                             | 0.226 (0.351)                                  |
| R-free                             | 0.256 (0.379)                                  |
| CC(work)                           | 0.919 (0.756)                                  |
| CC(free)                           | 0.904 (0.812)                                  |
| Number of non-hydrogen atoms       | 4833                                           |
| macromolecules                     | 4788                                           |
| ligands                            | 28                                             |
| solvent                            | 17                                             |
| Protein residues                   | 621                                            |
| RMS(bonds)                         | 0.008                                          |
| RMS(angles)                        | 1.22                                           |
| Ramachandran favored (%)           | 95.91                                          |
| Ramachandran allowed (%)           | 3.76                                           |
| Ramachandran outliers (%)          | 0.33                                           |
| Rotamer outliers (%)               | 1.32                                           |
| Clashscore                         | 4.01                                           |
| Average B-factor (Å <sup>2</sup> ) | 64                                             |
| macromolecules                     | 64                                             |
| ligands                            | 93                                             |
| solvent                            | 51                                             |
| Number of TLS groups               | 18                                             |
